# Supplementary material
Source: PubMed Central journal article supplement (PMC2711453)
Supplement: mmc1.pdf [file mmc1.pdf]

1 Biophysical Journal, Volume 96

2

3 **Supporting Material**

4

5 **Quantitative Surface-enhanced Raman for Gene Expression Estimation**

6

7 Lan Sun and Joseph Irudayaraj\*

8

9

10

11

12

13

14

15

16

17

18

19

20

21

22

23

24

1 **Supporting Material**  
2 **Quantitative Surface-enhanced Raman for Gene Expression Estimation**

3 Lan Sun and Joseph Irudayaraj\*

4

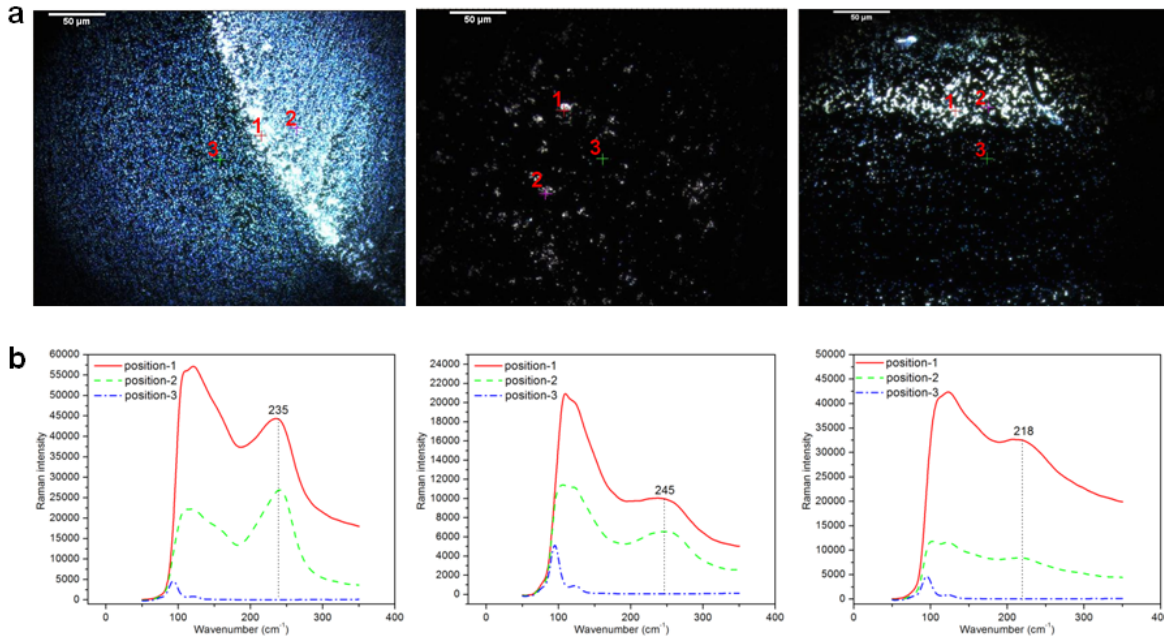

5  
6 **Figure S1** The plasmon-phonon mode of different SERS substrates. (a) Darkfield images of Ag  
7 nanoparticles, the Au nanoparticle film, and the Ag nanoparticle film (from left to right). Three  
8 locations were marked in each image with decreasing particle densities (position 1 to 3: dense  
9 particles, few particles, least number of particles or possible no particles). (b) Raman spectra of  
10 position 1 to 3 for Ag nanoparticles, the Au nanoparticle film, and the Ag nanoparticle film  
11 (from left to right).

12

13 In Fig. S1, three measurement locations with varying brightness indicating different particle  
14 densities (position 1 to 3: dense particles, few particles, least number of particles or possibly no  
15 particles) were marked in the darkfield images for Ag nanoparticles, the Au nanoparticle film  
16 and the Ag nanoparticle film (from left to right) respectively. The corresponding Raman spectra  
17 (Fig. S1 b) show that the intensity of the plasmon-phonon band was the highest at position-1  
18 where particle density was the highest, and the intensity decreased at position-2 and disappeared

- 1 at position-3 where there was least number of particles or possibly no particles. These results
- 2 reinforce our hypothesis that the plasmon-phonon mode inherent to metallic structures has an
- 3 increasing Raman intensity to correspond with increasing surface enhancement.
